# Supplementary material for: Urinary vanin-1, tubular injury, and graft failure in kidney transplant recipients
Source: PubMed Central journal article supplement (PMC10821939; doi:10.1038/s41598-024-52635-x), 2024-01-27
Supplement: 41598_2024_52635_MOESM1_ESM.pdf [file 41598_2024_52635_MOESM1_ESM.pdf]

# Urinary Vanin-1, Tubular Injury, and Graft Failure in Kidney Transplant Recipients

## SUPPLEMENTAL MATERIAL

### Table of contents

|                                                                                                                                                                                                                                                            |         |
|------------------------------------------------------------------------------------------------------------------------------------------------------------------------------------------------------------------------------------------------------------|---------|
| <b>Supplementary Figure 1.</b> Flow chart of the study population selection                                                                                                                                                                                | Page 2  |
| <b>Supplementary Table 1.</b> STROBE Statement – Checklist of items that should be included in reports of cohort studies.                                                                                                                                  | Page 3  |
| <b>Supplementary Table 2.</b> Prospective analysis of the association of 24h urinary vanin-1 excretion with death-censored graft failure in which urinary vanin-1 below the detection limit was excluded.                                                  | Page 6  |
| <b>Supplementary Table 3.</b> Prospective analysis of the association of 24h urinary vanin-1 excretion with death-censored graft failure in which 24h urinary vanin-1 excretion outside the 2.5 <sup>th</sup> -97.5 <sup>th</sup> percentile was excluded. | Page 7  |
| <b>Supplementary Table 4.</b> Prospective analysis of the association of 24h urinary vanin-1 excretion with death-censored graft failure in which 24h urinary vanin-1 excretion outside the 5 <sup>th</sup> -95 <sup>th</sup> percentile was excluded.     | Page 8  |
| <b>Supplementary Table 5.</b> Cox proportional-hazard regression analysis of the associations of urinary vanin-1 excretion with graft failure using various transformations in adjusted Cox regression models.                                             | Page 9  |
| <b>Supplementary Table 6.</b> Prospective analysis of the association of urinary Vanin-1 concentration with death-censored graft failure in 656 kidney transplant recipients.                                                                              | Page 10 |
| <b>Supplementary Table 7.</b> Prospective analysis of the association of urinary Vanin-1/creatinine ratio with death-censored graft failure in 656 kidney transplant recipients.                                                                           | Page 11 |

**Supplementary Figure 1.** Flow chart of the study population selection

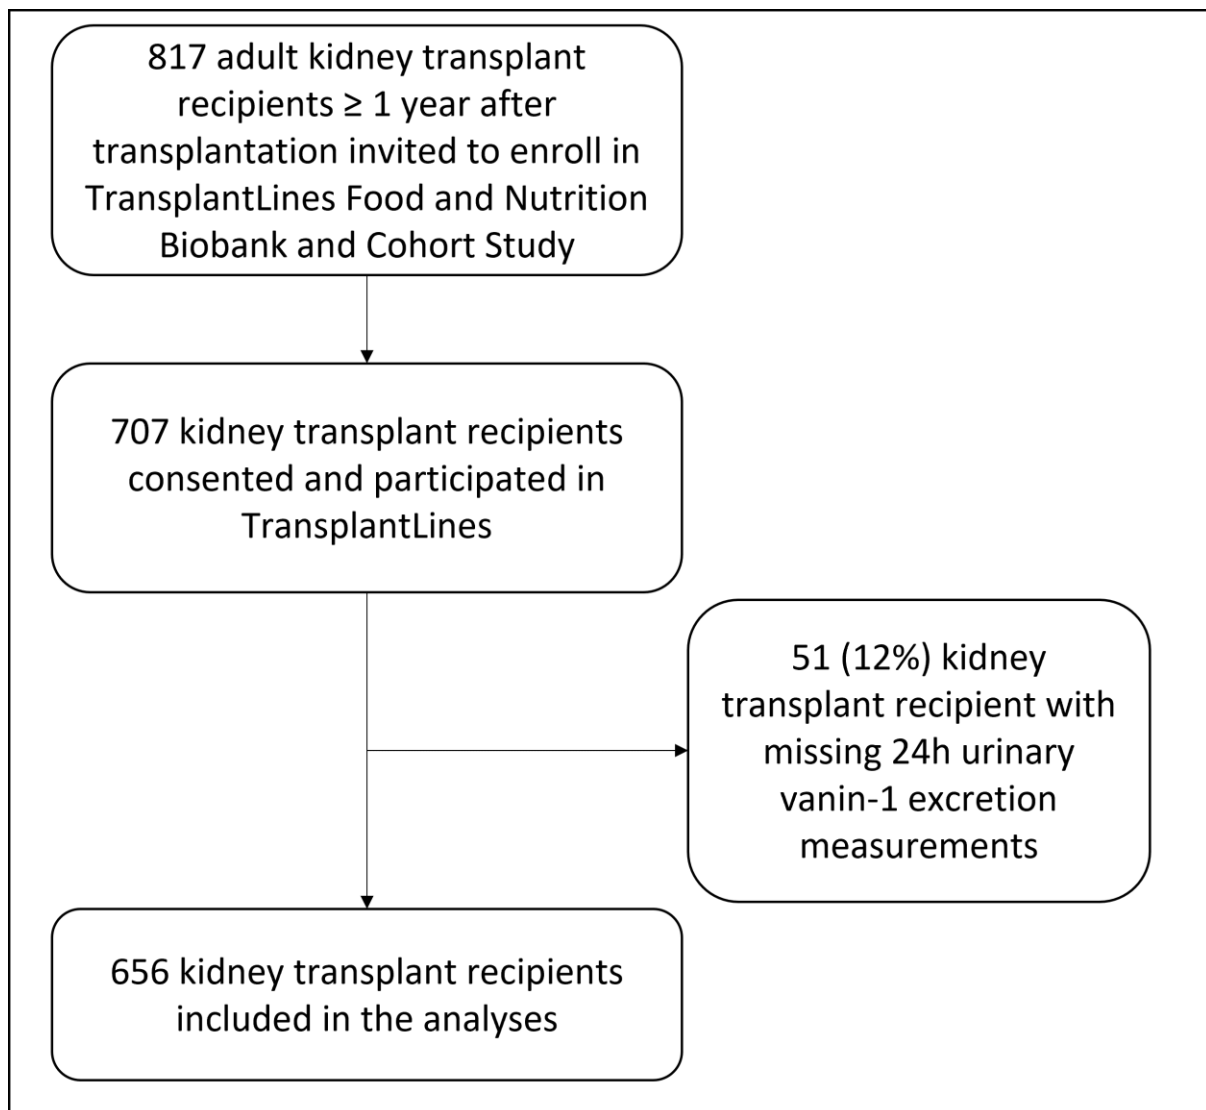

**Supplementary Table 1.** STROBE Statement – Checklist of items that should be included in reports of cohort studies.

|                              | <b>Item No</b> | <b>Recommendation</b>                                                                                                                                                                | <b>Page No</b>         |
|------------------------------|----------------|--------------------------------------------------------------------------------------------------------------------------------------------------------------------------------------|------------------------|
| <b>Title and abstract</b>    | 1              | (a) Indicate the study’s design with a commonly used term in the title or the abstract                                                                                               | Title and Abstract     |
|                              |                | (b) Provide in the abstract an informative and balanced summary of what was done and what was found                                                                                  | Abstract               |
| <b>Introduction</b>          |                |                                                                                                                                                                                      |                        |
| Background/rationale         | 2              | Explain the scientific background and rationale for the investigation being reported                                                                                                 | Introduction par 1-4   |
| Objectives                   | 3              | State specific objectives, including any prespecified hypotheses                                                                                                                     | Introduction par 4     |
| <b>Methods</b>               |                |                                                                                                                                                                                      |                        |
| Study design                 | 4              | Present key elements of study design early in the paper                                                                                                                              | Methods par 1          |
| Setting                      | 5              | Describe the setting, locations, and relevant dates, including periods of recruitment, exposure, follow-up, and data collection                                                      | Methods par 1-3        |
| Participants                 | 6              | (a) Give the eligibility criteria, and the sources and methods of selection of participants. Describe methods of follow-up                                                           | Methods par 1 and 2    |
|                              |                | (b) For matched studies, give matching criteria and number of exposed and unexposed                                                                                                  | N/A                    |
| Variables                    | 7              | Clearly define all outcomes, exposures, predictors, potential confounders, and effect modifiers. Give diagnostic criteria, if applicable                                             | Methods par 2 and 6    |
| Data sources/<br>measurement | 8*             | For each variable of interest, give sources of data and details of methods of assessment (measurement). Describe comparability of assessment methods if there is more than one group | Methods par 3 and 4    |
| Bias                         | 9              | Describe any efforts to address potential sources of bias                                                                                                                            | Methods par 5          |
| Study size                   | 10             | Explain how the study size was arrived at                                                                                                                                            | Supplementary figure 1 |
| Quantitative variables       | 11             | Explain how quantitative variables were handled in the analyses. If applicable, describe which groupings were chosen and why                                                         | Methods par 5          |
| Statistical methods          | 12             | (a) Describe all statistical methods, including those used to control for confounding                                                                                                | Methods par 5-7        |
|                              |                | (b) Describe any methods used to examine subgroups and interactions                                                                                                                  | Methods par 6          |

|                  |     |                                                                                                                                                                                                              |                                         |
|------------------|-----|--------------------------------------------------------------------------------------------------------------------------------------------------------------------------------------------------------------|-----------------------------------------|
|                  |     | (c) Explain how missing data were addressed                                                                                                                                                                  | Methods par 8                           |
|                  |     | (d) If applicable, explain how loss to follow-up was addressed                                                                                                                                               | N/A                                     |
|                  |     | (e) Describe any sensitivity analyses                                                                                                                                                                        | Methods par 7                           |
| <b>Results</b>   |     |                                                                                                                                                                                                              |                                         |
| Participants     | 13* | (a) Report numbers of individuals at each stage of study—eg numbers potentially eligible, examined for eligibility, confirmed eligible, included in the study, completing follow-up, and analysed            | Supplementary Figure 1                  |
|                  |     | (b) Give reasons for non-participation at each stage                                                                                                                                                         | Supplementary Figure 1                  |
|                  |     | (c) Consider use of a flow diagram                                                                                                                                                                           | Supplementary Figure 1                  |
| Descriptive data | 14* | (a) Give characteristics of study participants (eg demographic, clinical, social) and information on exposures and potential confounders                                                                     | Results par 1<br>Table 1                |
|                  |     | (b) Indicate number of participants with missing data for each variable of interest                                                                                                                          | Footnotes tables                        |
|                  |     | (c) Summarise follow-up time (eg, average and total amount)                                                                                                                                                  | Results par 3                           |
| Outcome data     | 15* | Report numbers of outcome events or summary measures over time                                                                                                                                               | Results par 3                           |
| Main results     | 16  | (a) Give unadjusted estimates and, if applicable, confounder-adjusted estimates and their precision (eg, 95% confidence interval). Make clear which confounders were adjusted for and why they were included | Table 2, Supplementary Table 3-7        |
|                  |     | (b) Report category boundaries when continuous variables were categorized                                                                                                                                    | Table 2, Supplementary Table 3, 4, 6, 7 |
|                  |     | (c) If relevant, consider translating estimates of relative risk into absolute risk for a meaningful time period                                                                                             | N/A                                     |
| Other analyses   | 17  | Report other analyses done—eg analyses of subgroups and interactions, and sensitivity analyses                                                                                                               | Results par 4                           |

| <b>Discussion</b>        |    |                                                                                                                                                                            |                    |
|--------------------------|----|----------------------------------------------------------------------------------------------------------------------------------------------------------------------------|--------------------|
| Key results              | 18 | Summarise key results with reference to study objectives                                                                                                                   | Discussion par 1   |
| Limitations              | 19 | Discuss limitations of the study, taking into account sources of potential bias or imprecision. Discuss both direction and magnitude of any potential bias                 | Discussion par 5   |
| Interpretation           | 20 | Give a cautious overall interpretation of results considering objectives, limitations, multiplicity of analyses, results from similar studies, and other relevant evidence | Discussion par 2-5 |
| Generalisability         | 21 | Discuss the generalisability (external validity) of the study results                                                                                                      | Discussion par 5   |
| <b>Other information</b> |    |                                                                                                                                                                            |                    |
| Funding                  | 22 | Give the source of funding and the role of the funders for the present study and, if applicable, for the original study on which the present article is based              | Funding section    |

**Supplementary Table 2.** Prospective analysis of the association of 24h urinary vanin-1 excretion with death-censored graft failure in which urinary vanin-1 below the detection limit were excluded.

|          | Tertile 1<br>N = 214<br>< 82.8<br>pmol/24h | Tertile 2<br>N = 214<br>83 – 247 pmol/24h |         | Tertile 3<br>N = 214<br>> 247 pmol/24h |         | Continuous (Per doubling) |         |
|----------|--------------------------------------------|-------------------------------------------|---------|----------------------------------------|---------|---------------------------|---------|
| n events | 26                                         | 35                                        |         | 32                                     |         | 93                        |         |
| Model    |                                            | HR (95% CI)                               | p-value | HR (95% CI)                            | p-value | HR (95% CI)               | p-value |
| Crude    | Ref                                        | 1.42 (0.85-2.35)                          | 0.2     | 1.21 (0.72-2.04)                       | 0.5     | 1.08 (0.93-0.97)          | 0.2     |
| Model 1  | Ref                                        | 1.49 (0.89-2.49)                          | 0.1     | 1.25 (0.74-2.10)                       | 0.4     | 1.09 (0.97-1.21)          | 0.1     |
| Model 2  | Ref                                        | 1.13 (0.67-1.89)                          | 0.6     | 1.05 (0.62-1.77)                       | 0.9     | 1.06 (0.94-1.19)          | 0.4     |
| Model 3  | Ref                                        | 0.91 (0.54-1.53)                          | 0.7     | 0.75 (0.44-1.29)                       | 0.3     | 0.97 (0.85-1.10)          | 0.6     |
| Model 4  | Ref                                        | 0.90 (0.53-1.52)                          | 0.7     | 0.74 (0.43-1.27)                       | 0.3     | 0.98 (0.87-1.12)          | 0.8     |

Of 656 kidney transplant recipients, 14 of them had urinary vanin-1 below the detection limit, leaving 642 kidney transplant recipients for Cox proportional-hazard regression analyses. Death-censored graft failure was defined as the need for re-transplantation or (re-)initiation of dialysis. Model 1 was adjusted for age, sex, and body surface area. Model 2 was further adjusted for the estimated glomerular filtration rate based on the creatinine-based CKD-EPI formula. Model 3 was further adjusted for 24-hour urinary protein excretion. Model 4 was further adjusted for the use of proliferation inhibitors. 95% CI, 95% confidence interval; HR, hazard ratio.

**Supplementary Table 3.** Prospective analysis of the association of 24h urinary vanin-1 excretion with death-censored graft failure in which 24h urinary vanin-1 excretion outside the 2.5<sup>th</sup>-97.5<sup>th</sup> percentile were excluded.

|          | Tertile 1<br>N = 208<br>< 79 pmol/24h | Tertile 2<br>N = 207<br>79 – 239 pmol/24h |         | Tertile 3<br>N = 207<br>> 239 pmol/24h |         | Continuous (Per doubling) |         |
|----------|---------------------------------------|-------------------------------------------|---------|----------------------------------------|---------|---------------------------|---------|
| n events | 26                                    | 33                                        |         | 31                                     |         | 90                        |         |
| Model    |                                       | HR (95% CI)                               | p-value | HR (95% CI)                            | p-value | HR (95% CI)               | p-value |
| Crude    | Ref                                   | 1.34 (0.80-2.24)                          | 0.3     | 1.17 (0.69-1.98)                       | 0.6     | 1.08 (0.96-1.22)          | 0.2     |
| Model 1  | Ref                                   | 1.43 (0.85-2.40)                          | 0.2     | 1.21 (0.71-2.05)                       | 0.5     | 1.09 (0.96-1.22)          | 0.2     |
| Model 2  | Ref                                   | 1.10 (0.65-1.85)                          | 0.7     | 1.01 (0.60-1.71)                       | 1.0     | 1.04 (0.92-1.18)          | 0.6     |
| Model 3  | Ref                                   | 0.92 (0.54-1.57)                          | 0.8     | 0.76 (0.44-1.30)                       | 0.3     | 0.96 (0.84-1.10)          | 0.6     |
| Model 4  | Ref                                   | 0.91 (0.54-1.56)                          | 0.7     | 0.74 (0.43-1.28)                       | 0.3     | 0.98 (0.86-1.12)          | 0.8     |

Of 656 kidney transplant recipients, 17 of them had urinary vanin-1 below the 2.5<sup>th</sup> percentile, and another 17 had urinary vanin-1 above the 97.5<sup>th</sup> percentile, leaving 622 kidney transplant recipients for Cox proportional-hazard regression analyses. Death-censored graft failure was defined as the need for re-transplantation or (re-)initiation of dialysis. Model 1 was adjusted for age, sex, and body surface area. Model 2 was further adjusted for the estimated glomerular filtration rate based on the creatinine-based CKD-EPI formula. Model 3 was further adjusted for 24-hour urinary protein excretion. Model 4 was further adjusted for the use of proliferation inhibitors. 95% CI, 95% confidence interval; HR, hazard ratio.

**Supplementary Table 4.** Prospective analysis of the association of 24h urinary vanin-1 excretion with death-censored graft failure in which 24h urinary vanin-1 excretion outside the 5<sup>th</sup>-95<sup>th</sup> percentile were excluded.

|          | Tertile 1<br>N = 197<br>< 84.3<br>pmol/24h | Tertile 2<br>N = 197<br>84.3 – 230 pmol/24h |         | Tertile 3<br>N = 196<br>> 230 pmol/24h |         | Continuous (Per doubling) |         |
|----------|--------------------------------------------|---------------------------------------------|---------|----------------------------------------|---------|---------------------------|---------|
| n events | 25                                         | 33                                          |         | 27                                     |         | 85                        |         |
| Model    |                                            | HR (95%CI)                                  | p-value | HR (95%CI)                             | p-value | HR (95%CI)                | p-value |
| Crude    | Ref                                        | 1.38 (0.82-2.32)                            | 0.2     | 1.06 (0.61-1.83)                       | 0.8     | 1.05 (0.92-1.21)          | 0.5     |
| Model 1  | Ref                                        | 1.47 (0.87-2.47)                            | 0.2     | 1.10 (0.63-1.90)                       | 0.7     | 1.06 (-.93-1.21)          | 0.4     |
| Model 2  | Ref                                        | 1.10 (0.65-1.87)                            | 0.7     | 0.90 (1.11-1.56)                       | 0.7     | 1.00 (0.87-1.15)          | 1.0     |
| Model 3  | Ref                                        | 0.92 (0.54-1.58)                            | 0.8     | 0.68 (0.39-1.19)                       | 0.2     | 0.93 (0.80-1.07)          | 0.3     |
| Model 4  | Ref                                        | 0.92 (0.54-1.57)                            | 0.7     | 0.67 (0.38-1.19)                       | 0.2     | 0.95 (0.82-1.10)          | 0.5     |

Of 656 kidney transplant recipients, 33 of them had urinary vanin-1 below the 5<sup>th</sup> percentile, and another 33 had urinary vanin-1 above the 95<sup>th</sup> percentile, leaving 590 kidney transplant recipients for Cox proportional-hazard regression analyses. Death-censored graft failure was defined as the need for re-transplantation or (re-)initiation of dialysis. Model 1 was adjusted for age, sex, and body surface area. Model 2 was further adjusted for the estimated glomerular filtration rate based on the creatinine-based CKD-EPI formula. Model 3 was further adjusted for 24-hour urinary protein excretion. Model 4 was further adjusted for the use of proliferation inhibitors. 95% CI, 95% confidence interval; HR, hazard ratio.



**Supplementary Table 5.** Cox proportional-hazard regression analysis of the associations of urinary vanin-1 excretion with graft failure using various transformations in adjusted Cox regression models.

| Transformation                         | Graft failure<br>$n_{\text{event}} = 79/656$ |         |
|----------------------------------------|----------------------------------------------|---------|
|                                        | HR (95% CI)                                  | p-value |
| Standardized urinary vanin-1 excretion | 1.00 (1.00-1.00)                             | 0.7     |
| Square root urinary vanin-1 excretion  | 0.99 (0.96-1.02)                             | 0.5     |
| 1/Urinary vanin-1 excretion            | 1.24 (0.62-2.47)                             | 0.5     |

Models were adjusted for age, sex, body surface area, estimated glomerular filtration rate based on creatinine-based CKD-EPI formula, 24-hour urinary protein excretion, and the use of proliferation inhibitor. 95% CI, 95% confidence interval; HR, hazard ratio.

**Supplementary Table 6.** Prospective analysis of the association of urinary Vanin-1 concentration with death-censored graft failure in 656 kidney transplant recipients.

|          | Tertile 1<br>N = 219<br>< 32.3 pmol/L | Tertile 2<br>N = 219<br>32.3 – 109.3 pmol/L |         | Tertile 3<br>N = 218<br>> 109.3 pmol/L |         | Continuous (Per doubling) |         |
|----------|---------------------------------------|---------------------------------------------|---------|----------------------------------------|---------|---------------------------|---------|
| n events | 23                                    | 37                                          |         | 34                                     |         | 94                        |         |
| Model    |                                       | HR (95% CI)                                 | p-value | HR (95% CI)                            | p-value | HR (95% CI)               | p-value |
| Crude    | Ref                                   | 1.73 (1.02-2.90)                            | 0.040   | 1.50 (0.88-2.56)                       | 0.1     | 1.11 (1.00-1.22)          | 0.044   |
| Model 1  | Ref                                   | 1.85 (1.09-3.13)                            | 0.022   | 1.53 (0.89-2.61)                       | 0.1     | 1.11 (1.01-1.22)          | 0.039   |
| Model 2  | Ref                                   | 1.33 (0.78-2.25)                            | 0.3     | 1.16 (0.68-1.98)                       | 0.6     | 1.05 (0.94-1.18)          | 0.4     |
| Model 3  | Ref                                   | 1.09 (0.63-1.87)                            | 0.8     | 0.85 (0.49-1.47)                       | 0.6     | 0.98 (0.87-1.09)          | 0.7     |
| Model 4  | Ref                                   | 0.98 (0.54-1.75)                            | 0.9     | 0.71 (0.39-1.30)                       | 0.3     | 0.97 (0.87-1.09)          | 0.6     |

Cox proportional-hazard regression analyses were performed to assess the association of urinary vanin-1 concentration with the risk of death-censored graft failure (the need for re-transplantation or (re-)initiation of dialysis). Model 1 was adjusted for age, sex, and body surface area. Model 2 was further adjusted for the estimated glomerular filtration rate based on the creatinine-based CKD-EPI formula. Model 3 was further adjusted for 24-hour urinary protein excretion. Model 4 was further adjusted for the use of proliferation inhibitors. 95% CI, 95% confidence interval; HR, hazard ratio.

**Supplementary Table 7.** Prospective analysis of the association of urinary Vanin-1/creatinine ratio with death-censored graft failure in 656 kidney transplant recipients.

|          | Tertile 1<br>N = 219<br>< 7.21<br>pmol/mmol | Tertile 2<br>N = 219<br>7.21 – 21.78 pmol/mmol |         | Tertile 3<br>N = 218<br>> 21.78 pmol/mmol |         | Continuous (Per doubling) |         |
|----------|---------------------------------------------|------------------------------------------------|---------|-------------------------------------------|---------|---------------------------|---------|
| n events | 21                                          | 41                                             |         | 32                                        |         | 94                        |         |
| Model    |                                             | HR (95% CI)                                    | p-value | HR (95% CI)                               | p-value | HR (95% CI)               | p-value |
| Crude    | Ref                                         | 2.11 (1.25-3.57)                               | 0.005   | 1.65 (0.95-2.86)                          | 0.078   | 1.11 (1.01-1.23)          | 0.039   |
| Model 1  | Ref                                         | 2.24 (1.32-3.81)                               | 0.003   | 1.74 (1.00-3.03)                          | 0.051   | 1.12 (1.01-1.24)          | 0.025   |
| Model 2  | Ref                                         | 1.53 (0.89-2.60)                               | 0.1     | 1.44 (0.82-2.52)                          | 0.2     | 1.07 (0.95-1.20)          | 0.3     |
| Model 3  | Ref                                         | 1.19 (0.69-2.05)                               | 0.5     | 1.03 (0.58-1.83)                          | 0.9     | 0.99 (0.88-1.11)          | 0.8     |
| Model 4  | Ref                                         | 1.11 (0.61-2.03)                               | 0.7     | 0.96 (0.51-1.83)                          | 0.9     | 0.99 (0.88-1.11)          | 0.8     |

Cox proportional-hazard regression analyses were performed to assess the association of urinary vanin-1/creatinine ratio with the risk of death-censored graft failure (the need for re-transplantation or (re-)initiation of dialysis). Model 1 was adjusted for age, sex, and body surface area. Model 2 was further adjusted for the estimated glomerular filtration rate based on the creatinine-based CKD-EPI formula. Model 3 was further adjusted for 24-hour urinary protein excretion. Model 4 was further adjusted for the use of proliferation inhibitors. 95% CI, 95% confidence interval; HR, hazard ratio.
